# Supplementary material for: Adalimumab with Methotrexate in Treatment-Naïve Japanese Patients with Rheumatoid Arthritis at Risk of Progressive Structural Joint Damage: A Postmarketing Observational Study
Source: PubMed Central journal article supplement — Rheumatol Ther. 2017 Mar 31;4(1):151–66. doi: 10.1007/s40744-017-0059-1 (PMC5443728; doi:10.1007/s40744-017-0059-1), 2017-03-31
Supplement: 40744_2017_59_MOESM1_ESM.pdf [file 40744_2017_59_MOESM1_ESM.pdf]

**Supplementary Table 1.** Multivariate analysis of patient characteristics and remission<sup>a</sup>

| Factors by patient background             | Level              | Cases for DAS28-4CRP evaluation |          |                              | No. of multiple logistics regression analysis cases amongst cases for DAS28-4CRP evaluation |          |                              | Standard | Odds ratio | Two-sided 95% Wald confidence interval of odds ratio |
|-------------------------------------------|--------------------|---------------------------------|----------|------------------------------|---------------------------------------------------------------------------------------------|----------|------------------------------|----------|------------|------------------------------------------------------|
|                                           |                    | All cases                       |          | Remission cases <sup>b</sup> | All cases                                                                                   |          | Remission cases <sup>b</sup> |          |            |                                                      |
|                                           |                    | <i>N</i>                        | <i>N</i> | %                            | <i>N</i>                                                                                    | <i>N</i> | %                            |          |            |                                                      |
| No. of cases                              |                    | 145                             | 99       | 68.3                         | 128                                                                                         | 86       | 67.2                         |          | —          | —                                                    |
| Gender, <i>n</i>                          | Male               | 50                              | 36       | 72.0                         | 44                                                                                          | 32       | 72.7                         | *        | —          | —                                                    |
|                                           | Female             | 95                              | 63       | 66.3                         | 84                                                                                          | 54       | 64.3                         |          | 0.66       | 0.26–1.65                                            |
| Age, years                                | Child (<15)        | 0                               | 0        | —                            | 0                                                                                           | 0        | —                            |          | —          | —                                                    |
|                                           | Adult (≥15 to <65) | 97                              | 63       | 64.9                         | 88                                                                                          | 56       | 63.6                         | *        | —          | —                                                    |
|                                           | Elderly (≥65)      | 48                              | 36       | 75.0                         | 40                                                                                          | 30       | 75.0                         |          | —          | —                                                    |
| Weight, kg                                | <30                | 0                               | 0        | —                            | 0                                                                                           | 0        | —                            |          | —          | —                                                    |
|                                           | ≥30 to <40         | 5                               | 1        | 20.0                         | 3                                                                                           | 1        | 33.3                         |          | —          | —                                                    |
|                                           | ≥40 to <50         | 27                              | 17       | 63.0                         | 25                                                                                          | 15       | 60.0                         | *        | —          | —                                                    |
|                                           | ≥50 to <60         | 36                              | 27       | 75.0                         | 30                                                                                          | 21       | 70.0                         |          | —          | —                                                    |
|                                           | ≥60                | 42                              | 29       | 69.0                         | 39                                                                                          | 27       | 69.2                         |          | —          | —                                                    |
| Duration of RA, months                    | Unknown            | 35                              | 25       | 71.4                         |                                                                                             |          |                              |          | —          | —                                                    |
|                                           | <3                 | 55                              | 41       | 74.5                         | 52                                                                                          | 40       | 76.9                         | *        | —          | —                                                    |
|                                           | ≥3 to <6           | 53                              | 33       | 62.3                         | 45                                                                                          | 26       | 57.8                         |          | 0.34       | 0.12–0.99                                            |
|                                           | ≥6                 | 32                              | 21       | 65.6                         | 31                                                                                          | 20       | 64.5                         |          | 0.63       | 0.19–2.05                                            |
| DAS28-4CRP at the time of drug initiation | Unknown            | 5                               | 4        | 80.0                         |                                                                                             |          |                              |          | —          | —                                                    |
|                                           | ≤5.1               | 73                              | 54       | 74.0                         | 69                                                                                          | 51       | 73.9                         | *        | —          | —                                                    |
|                                           | >5.1               | 61                              | 36       | 59.0                         | 59                                                                                          | 35       | 59.3                         |          | 0.57       | 0.23–1.40                                            |
| Complication: Hepatopathy                 | Unknown            | 11                              | 9        | 81.8                         |                                                                                             |          |                              |          | —          | —                                                    |
|                                           | Absent             | 131                             | 90       | 68.7                         | 114                                                                                         | 77       | 67.5                         | *        | —          | —                                                    |
| Complication: Renal disorder              | Present            | 14                              | 9        | 64.3                         | 14                                                                                          | 9        | 64.3                         |          | 0.76       | 0.17–3.54                                            |
|                                           | Absent             | 144                             | 98       | 68.1                         | 127                                                                                         | 85       | 66.9                         | *        | —          | —                                                    |
| Complication: Cardiac disorder            | Present            | 1                               | 1        | 100.0                        | 1                                                                                           | 1        | 100.0                        |          | —          | —                                                    |
|                                           | Absent             | 119                             | 77       | 64.7                         | 108                                                                                         | 69       | 63.9                         | *        | —          | —                                                    |
|                                           | Present            | 26                              | 22       | 84.6                         | 20                                                                                          | 17       | 85.0                         |          | 4.11       | 0.91–18.53                                           |

|                                                                                             |         |     |    |       |     |    |       |   |      |             |
|---------------------------------------------------------------------------------------------|---------|-----|----|-------|-----|----|-------|---|------|-------------|
| Complication: Blood disorder                                                                | Absent  | 140 | 97 | 69.3  | 125 | 84 | 67.2  | * | —    | —           |
|                                                                                             | Present | 5   | 2  | 40.0  | 3   | 2  | 66.7  |   | 2.86 | 0.10–83.48  |
| Complication: Respiratory disorder                                                          | Absent  | 130 | 88 | 67.7  | 115 | 77 | 67.0  | * | —    | —           |
|                                                                                             | Present | 15  | 11 | 73.3  | 13  | 9  | 69.2  |   | 1.37 | 0.31–6.04   |
| Complication: Diabetes                                                                      | Absent  | 135 | 93 | 68.9  | 119 | 80 | 67.2  | * | —    | —           |
|                                                                                             | Present | 10  | 6  | 60.0  | 9   | 6  | 66.7  |   | 0.98 | 0.17–5.56   |
| Complication: Malignancy                                                                    | Absent  | 145 | 99 | 68.3  | 128 | 86 | 67.2  | * | —    | —           |
|                                                                                             | Present | 0   | 0  | —     | 0   | 0  | —     |   | —    | —           |
| Past medical history: Tuberculosis                                                          | Absent  | 142 | 97 | 68.3  | 125 | 84 | 67.2  | * | —    | —           |
|                                                                                             | Present | 3   | 2  | 66.7  | 3   | 2  | 66.7  |   | 1.15 | 0.07–17.74  |
| Past medical history: Nontuberculous mycobacterial infection                                | Absent  | 145 | 99 | 68.3  | 128 | 86 | 67.2  | * | —    | —           |
|                                                                                             | Present | 0   | 0  | —     | 0   | 0  | —     |   | —    | —           |
| Past medical history: Interstitial pneumonia                                                | Absent  | 145 | 99 | 68.3  | 128 | 86 | 67.2  | * | —    | —           |
|                                                                                             | Present | 0   | 0  | —     | 0   | 0  | —     |   | —    | —           |
| Past medical history: Bacterial bronchitis                                                  | Absent  | 145 | 99 | 68.3  | 128 | 86 | 67.2  | * | —    | —           |
|                                                                                             | Present | 0   | 0  | —     | 0   | 0  | —     |   | —    | —           |
| Past medical history: Obstructive lung disease                                              | Absent  | 145 | 99 | 68.3  | 128 | 86 | 67.2  | * | —    | —           |
|                                                                                             | Present | 0   | 0  | —     | 0   | 0  | —     |   | —    | —           |
| Past medical history: Hypoplastic anemia                                                    | Absent  | 145 | 99 | 68.3  | 128 | 86 | 67.2  | * | —    | —           |
|                                                                                             | Present | 0   | 0  | —     | 0   | 0  | —     |   | —    | —           |
| Past medical history: Pancytopenia                                                          | Absent  | 145 | 99 | 68.3  | 128 | 86 | 67.2  | * | —    | —           |
|                                                                                             | Present | 0   | 0  | —     | 0   | 0  | —     |   | —    | —           |
| Past medical history: Malignancy                                                            | Absent  | 142 | 96 | 67.6  | 125 | 83 | 66.4  | * | —    | —           |
|                                                                                             | Present | 3   | 3  | 100.0 | 3   | 3  | 100.0 |   | —    | —           |
| History of allergy to drug                                                                  | Absent  | 138 | 94 | 68.1  | 123 | 82 | 66.7  | * | —    | —           |
|                                                                                             | Present | 7   | 5  | 71.4  | 5   | 4  | 80.0  |   | 1.58 | 0.10–25.22  |
| History of smoking                                                                          | Absent  | 82  | 55 | 67.1  | 71  | 46 | 64.8  | * | —    | —           |
|                                                                                             | Present | 43  | 30 | 69.8  | 40  | 27 | 67.5  |   | —    | —           |
| Laboratory test before drug initiation: Peripheral white blood cell count, /mm <sup>3</sup> | Unknown | 20  | 14 | 70.0  |     |    |       |   |      |             |
|                                                                                             | ≥4000   | 141 | 96 | 68.1  | 126 | 85 | 67.5  |   | 6.45 | 0.22–193.30 |

|                                                                                                   |                |     |    |      |     |    |      |   |      |           |
|---------------------------------------------------------------------------------------------------|----------------|-----|----|------|-----|----|------|---|------|-----------|
|                                                                                                   | <4000          | 4   | 3  | 75.0 | 2   | 1  | 50.0 | * | —    | —         |
| Laboratory test before drug initiation:<br>Peripheral blood lymphocyte count,<br>/mm <sup>3</sup> | ≥1000          | 131 | 91 | 69.5 | 117 | 79 | 67.5 |   | 1.28 | 0.25–6.70 |
|                                                                                                   | <1000          | 12  | 7  | 58.3 | 11  | 7  | 63.6 | * | —    | —         |
|                                                                                                   | Not conducted  | 2   | 1  | 50.0 |     |    |      |   |      |           |
| Stage and degree of progression of<br>Steinbrocker                                                | Stage I + II   | 129 | 90 | 69.8 | 114 | 78 | 68.4 | * | —    | —         |
|                                                                                                   | Stage III + IV | 16  | 9  | 56.3 | 14  | 8  | 57.1 |   | 0.63 | 0.15–2.64 |
| Degree of Steinbrocker dysfunction                                                                | Class I + II   | 117 | 85 | 72.6 | 104 | 73 | 70.2 | * | —    | —         |
|                                                                                                   | Class III + IV | 28  | 14 | 50.0 | 24  | 13 | 54.2 |   | 0.45 | 0.14–1.42 |
| At the time of drug initiation: MTX<br>administration dose (mg/week)                              | <8             | 75  | 51 | 68.0 | 63  | 42 | 66.7 | * | —    | —         |
|                                                                                                   | ≥8             | 70  | 48 | 68.6 | 65  | 44 | 67.7 |   | 1.23 | 0.51–2.94 |
| Concomitant use: Adrenal corticosteroid                                                           | Absent         | 98  | 64 | 65.3 | 85  | 54 | 63.5 | * | —    | —         |
|                                                                                                   | Present        | 47  | 35 | 74.5 | 43  | 32 | 74.4 |   | 1.80 | 0.68–4.76 |
| Concomitant use: DMARDs other than<br>MTX                                                         | Absent         | 132 | 92 | 69.7 | 115 | 79 | 68.7 | * | —    | —         |
|                                                                                                   | Present        | 13  | 7  | 53.8 | 13  | 7  | 53.8 |   | 0.37 | 0.08–1.71 |

DAS28-4CRP, Disease Activity Score based on 28-joint count and using C-reactive protein; DMARD, disease-modifying antirheumatic drug; MTX, methotrexate; RA, rheumatoid arthritis.

<sup>a</sup>The Hosmer-Lemeshow Goodness-of-Fit Test:  $P=0.0918$  (DF: 8).

<sup>b</sup>The denominator of the ratio is the total number of cases of each level/standard of each study group.

**Supplementary Table 2.** Univariate analysis of patient characteristics and remission

| Factors by patient background             | Level              | Cases for DAS28-4CRP evaluation |    |                              | Standard | Odds ratio          | Two-sided 95% Wald confidence interval of odds ratio |
|-------------------------------------------|--------------------|---------------------------------|----|------------------------------|----------|---------------------|------------------------------------------------------|
|                                           |                    | All cases                       |    | Remission cases <sup>a</sup> |          |                     |                                                      |
|                                           |                    | N                               | N  |                              |          |                     |                                                      |
| No. of cases                              |                    | 145                             | 99 | 68.3                         |          | —                   | —                                                    |
| Gender                                    | Male               | 50                              | 36 | 72.0                         | *        | —                   | —                                                    |
|                                           | Female             | 95                              | 63 | 66.3                         |          | 0.77                | 0.36–1.62                                            |
| Age, years                                | Child (<15)        | 0                               | 0  | —                            |          | —                   | —                                                    |
|                                           | Adult (≥15 to <65) | 97                              | 63 | 64.9                         | *        | —                   | —                                                    |
|                                           | Elderly (≥65)      | 48                              | 36 | 75.0                         |          | 1.62                | 0.75–3.51                                            |
| Weight, kg                                | <30                | 0                               | 0  | —                            |          | —                   | —                                                    |
|                                           | ≥30 to <40         | 5                               | 1  | 20.0                         |          | 0.15                | 0.01–1.51                                            |
|                                           | ≥40 to <50         | 27                              | 17 | 63.0                         | *        | —                   | —                                                    |
|                                           | ≥50 to <60         | 36                              | 27 | 75.0                         |          | 1.76                | 0.60–5.23                                            |
|                                           | ≥60                | 42                              | 29 | 69.0                         |          | 1.31                | 0.47–3.63                                            |
| Duration of RA, months                    | Unknown            | 35                              | 25 | 71.4                         |          | —                   | —                                                    |
|                                           | <3                 | 55                              | 41 | 74.5                         | *        | —                   | —                                                    |
|                                           | ≥3 to <6           | 53                              | 33 | 62.3                         |          | 0.56                | 0.25–1.28                                            |
|                                           | ≥6                 | 32                              | 21 | 65.6                         |          | 0.65                | 0.25–1.68                                            |
| DAS28-4CRP at the time of drug initiation | Unknown            | 5                               | 4  | 80.0                         |          | —                   | —                                                    |
|                                           | ≤5.1               | 73                              | 54 | 74.0                         | *        | —                   | —                                                    |
|                                           | >5.1               | 61                              | 36 | 59.0                         |          | 0.51                | 0.24–1.05                                            |
| Complication: Hepatopathy                 | Unknown            | 11                              | 9  | 81.8                         |          | —                   | —                                                    |
|                                           | Absent             | 131                             | 90 | 68.7                         | *        | —                   | —                                                    |
| Complication: Renal disorder              | Present            | 14                              | 9  | 64.3                         |          | 0.82                | 0.26–2.60                                            |
|                                           | Absent             | 144                             | 98 | 68.1                         | *        | —                   | —                                                    |
| Complication: Cardiac disorder            | Present            | 1                               | 1  | 100.0                        |          | Complete separation | Complete separation                                  |
|                                           | Absent             | 119                             | 77 | 64.7                         | *        | —                   | —                                                    |
| Complication: Blood disorder              | Present            | 26                              | 22 | 84.6                         |          | 3.00                | 0.97–9.28                                            |
|                                           | Absent             | 140                             | 97 | 69.3                         | *        | —                   | —                                                    |
| Complication: Blood disorder              | Present            | 5                               | 2  | 40.0                         |          | 0.30                | 0.05–1.83                                            |

|                                                                                             |               |     |    |       |   |                     |                     |
|---------------------------------------------------------------------------------------------|---------------|-----|----|-------|---|---------------------|---------------------|
| Complication: Respiratory disorder                                                          | Absent        | 130 | 88 | 67.7  | * | —                   | —                   |
|                                                                                             | Present       | 15  | 11 | 73.3  |   | 1.31                | 0.39–4.37           |
| Complication: Diabetes                                                                      | Absent        | 135 | 93 | 68.9  | * | —                   | —                   |
|                                                                                             | Present       | 10  | 6  | 60.0  |   | 0.68                | 0.18–2.53           |
| Complication: Malignancy                                                                    | Absent        | 145 | 99 | 68.3  | * | —                   | —                   |
|                                                                                             | Present       | 0   | 0  | —     |   | —                   | —                   |
| Past medical history: Tuberculosis                                                          | Absent        | 142 | 97 | 68.3  | * | —                   | —                   |
|                                                                                             | Present       | 3   | 2  | 66.7  |   | 0.93                | 0.08–10.49          |
| Past medical history: Nontuberculous mycobacterial infection                                | Absent        | 145 | 99 | 68.3  | * | —                   | —                   |
|                                                                                             | Present       | 0   | 0  | —     |   | —                   | —                   |
| Past medical history: Interstitial pneumonia                                                | Absent        | 145 | 99 | 68.3  | * | —                   | —                   |
|                                                                                             | Present       | 0   | 0  | —     |   | —                   | —                   |
| Past medical history: Bacterial bronchitis                                                  | Absent        | 145 | 99 | 68.3  | * | —                   | —                   |
|                                                                                             | Present       | 0   | 0  | —     |   | —                   | —                   |
| Past medical history: Obstructive lung disease                                              | Absent        | 145 | 99 | 68.3  | * | —                   | —                   |
|                                                                                             | Present       | 0   | 0  | —     |   | —                   | —                   |
| Past medical history: Hypoplastic anemia                                                    | Absent        | 145 | 99 | 68.3  | * | —                   | —                   |
|                                                                                             | Present       | 0   | 0  | —     |   | —                   | —                   |
| Past medical history: Pancytopenia                                                          | Absent        | 145 | 99 | 68.3  | * | —                   | —                   |
|                                                                                             | Present       | 0   | 0  | —     |   | —                   | —                   |
| Past medical history: Malignancy                                                            | Absent        | 142 | 96 | 67.6  | * | —                   | —                   |
|                                                                                             | Present       | 3   | 3  | 100.0 |   | Complete separation | Complete separation |
| History of allergy to drug                                                                  | Absent        | 138 | 94 | 68.1  | * | —                   | —                   |
|                                                                                             | Present       | 7   | 5  | 71.4  |   | 1.17                | 0.22–6.27           |
| History of smoking                                                                          | Absent        | 82  | 55 | 67.1  | * | —                   | —                   |
|                                                                                             | Present       | 43  | 30 | 69.8  |   | 1.13                | 0.51–2.51           |
|                                                                                             | Unknown       | 20  | 14 | 70.0  |   | —                   | —                   |
| Laboratory test before drug initiation: Peripheral white blood cell count, /mm <sup>3</sup> | ≥4000         | 141 | 96 | 68.1  |   | 0.71                | 0.07–7.03           |
|                                                                                             | <4000         | 4   | 3  | 75.0  | * | —                   | —                   |
| Laboratory test before drug initiation: Peripheral blood lymphocyte count, /mm <sup>3</sup> | ≥1000         | 131 | 91 | 69.5  |   | 1.63                | 0.49–5.43           |
|                                                                                             | <1000         | 12  | 7  | 58.3  | * | —                   | —                   |
|                                                                                             | Not conducted | 2   | 1  | 50.0  |   | —                   | —                   |

|                                                                  |                |     |    |      |   |      |           |
|------------------------------------------------------------------|----------------|-----|----|------|---|------|-----------|
| Stage and degree of progression of Steinbrocker                  | Stage I + II   | 129 | 90 | 69.8 | * | —    | —         |
|                                                                  | Stage III + IV | 16  | 9  | 56.3 |   | 0.56 | 0.19–1.60 |
| Degree of Steinbrocker dysfunction                               | Class I + II   | 117 | 85 | 72.6 | * | —    | —         |
|                                                                  | Class III + IV | 28  | 14 | 50.0 |   | 0.38 | 0.16–0.88 |
| At the time of drug initiation: MTX administration dose, mg/week | <8             | 75  | 51 | 68.0 | * | —    | —         |
|                                                                  | ≥8             | 70  | 48 | 68.6 |   | 1.03 | 0.51–2.07 |
| Concomitant use: Adrenal corticosteroid                          | Absent         | 98  | 64 | 65.3 | * | —    | —         |
|                                                                  | Present        | 47  | 35 | 74.5 |   | 1.55 | 0.71–3.37 |
| Concomitant use: DMARDs other than MTX                           | Absent         | 132 | 92 | 69.7 | * | —    | —         |
|                                                                  | Present        | 13  | 7  | 53.8 |   | 0.51 | 0.16–1.60 |

DAS28-4CRP, Disease Activity Score based on 28-joint count and using C-reactive protein; DMARD, disease-modifying antirheumatic drug; MTX, methotrexate; RA, rheumatoid arthritis.

<sup>a</sup>The denominator of the ratio is the total number of cases of each level/standard of each study group.
